# Supplementary material
Source: Springer Nature journal article supplement (https://www.springermedizin.de/resource/supplementary/12943_2011_1045_MOESM2_ESM.pdf/9552084)

A

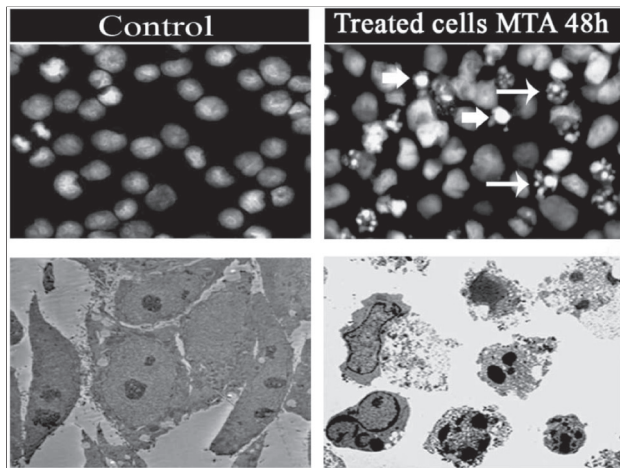

B

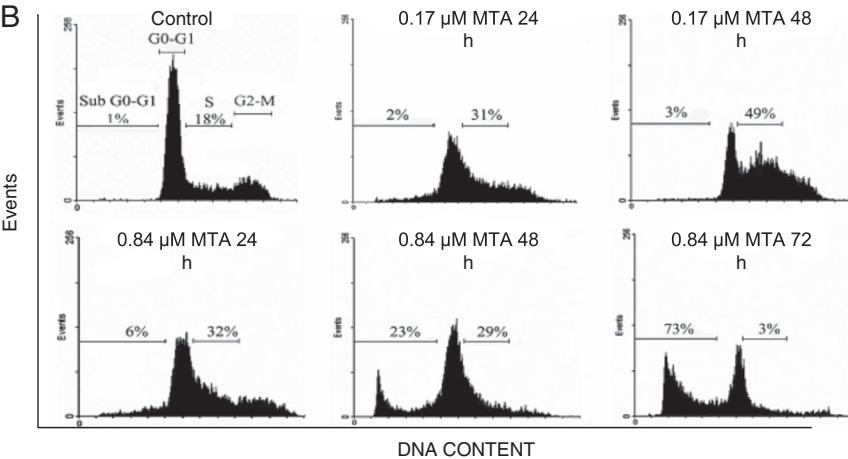

C

|         |                    | A375   |      | HT144  |      | MeWo   |      |
|---------|--------------------|--------|------|--------|------|--------|------|
|         |                    | Sub G0 | S    | Sub G0 | S    | Sub G0 | S    |
| Control |                    | 0.7    | 11.9 | 0.7    | 14.5 | 4.1    | 13.2 |
| 24h     | 0.17 $\mu\text{M}$ | 5.5    | 24.4 | 2.3    | 23.6 | 3      | 16.5 |
|         | 0.84 $\mu\text{M}$ | 17.8   | 15.5 | 22     | 10   | 1      | 10.5 |
| 48h     | 0.17 $\mu\text{M}$ | 11.2   | 35.3 | 9.1    | 35.2 | 2.5    | 45.7 |
|         | 0.84 $\mu\text{M}$ | 43.5   | 10   | 45.7   | 9.1  | 11.1   | 14.8 |
| 72h     | 0.17 $\mu\text{M}$ | 60.7   | 1.8  | 50.6   | 10.9 | 41.35  | 14.1 |
|         | 0.84 $\mu\text{M}$ | 85.9   | 1.3  | 93.9   | 1.9  | 97.6   | 1    |

Supplement: MOESM2 [file 9552084]
